# Supplementary material for: Nurses as agents for achieving environmentally sustainable health systems: A bibliometric analysis
Source: PubMed Central journal article supplement — J Nurs Manag. 2022 Sep 26;30(8):3900–8. doi: 10.1111/jonm.13798 (PMC10086962; doi:10.1111/jonm.13798), 2022-09-26
Supplement: JONM-30-3900-s001.pdf [file JONM-30-3900-s001.pdf]

**Appendix 1.** The top ten of the most cited documents

| <i>Title</i>                                                              | <i>Country</i> | <i>Type of study</i>  | <i>Sample</i>                                    | <i>Variables</i>                                                                | <i>Results</i>                                                                                                                                                                                                                                                                              | <i>Source</i>                                                   | <i>Citations</i> | <i>Checklist</i>      |
|---------------------------------------------------------------------------|----------------|-----------------------|--------------------------------------------------|---------------------------------------------------------------------------------|---------------------------------------------------------------------------------------------------------------------------------------------------------------------------------------------------------------------------------------------------------------------------------------------|-----------------------------------------------------------------|------------------|-----------------------|
| <i>Sustainability in nursing: A concept analysis</i> (Anåker & Elf, 2014) | <i>Sweden</i>  | Scoping<br><br>Review | <i>14</i> articles<br><br>from 1990-<br><br>2012 | <i>Sustainable</i> concept and healthcare sector related to the role of nursing | <i>The research, through concept analysis, identified six attributes of sustainability and nursing. The results highly that the topics based on nursing education regarding ecology. The key to achieving it is through nursing academic programs. Additionally, the article emphasizes</i> | <i>Scandinavian Journal of Caring Sciences (Indexed in JCR)</i> | <i>51</i>        | <i>Not applicable</i> |

*the relevance of including sustainability in healthcare organizations.*

|                                                                  |                                                                   |                |             |             |                                                                                                                              |                                       |                       |
|------------------------------------------------------------------|-------------------------------------------------------------------|----------------|-------------|-------------|------------------------------------------------------------------------------------------------------------------------------|---------------------------------------|-----------------------|
| <b>Primary health care and the Sustainable Goals Development</b> | <i>Intercontinental (UK, Brazil, Belgium Ghana and Australia)</i> | <i>Comment</i> | <i>None</i> | <i>None</i> | <i>Primary health care has. A key role in achieving SDGs being indispensable strategies to adapt the working environment</i> | <i>The Lancet 51 (Indexed in JCR)</i> | <i>Not Applicable</i> |
|                                                                  |                                                                   |                |             |             | <i>Also, it is highlighted the relevance of the workforce including nurses or midwives, but there is a scarcity</i>          |                                       |                       |

---

*of a proposed strategy for implementation and its monitoring.*

---

|                                                                                                                                                                                |                                   |                                                                      |                                                                                         |                                                                                                                                                                                                                   |                                                      |           |                                      |
|--------------------------------------------------------------------------------------------------------------------------------------------------------------------------------|-----------------------------------|----------------------------------------------------------------------|-----------------------------------------------------------------------------------------|-------------------------------------------------------------------------------------------------------------------------------------------------------------------------------------------------------------------|------------------------------------------------------|-----------|--------------------------------------|
| <p><i>The use of UK evidence-informed sustainability scenarios in the nursing curriculum: Development and evaluation of teaching methods</i><br/>(Richardson et al., 2014)</p> | <p><i>Observational study</i></p> | <p><i>Thirty nursing students studying from the second year.</i></p> | <p><i>Skill facilitator and environmental awareness related to waste production</i></p> | <p><i>The results indicated education improves students' perception regarding the problem of the sustainability. The way to achieve awareness is through clinically relevant scenarios in skill sessions.</i></p> | <p><i>Nurse Education Today (Indexed in JCR)</i></p> | <p>35</p> | <p>STROBE<br/>11/32<br/>(34.38%)</p> |
|--------------------------------------------------------------------------------------------------------------------------------------------------------------------------------|-----------------------------------|----------------------------------------------------------------------|-----------------------------------------------------------------------------------------|-------------------------------------------------------------------------------------------------------------------------------------------------------------------------------------------------------------------|------------------------------------------------------|-----------|--------------------------------------|

---

|                                                                                                                      |               |                                 |                                                                                                                                                                                                                                                                                                                                                                                                                                                                                                                                                                                  |                                                                                                                                                                                                          |                                                            |                                     |
|----------------------------------------------------------------------------------------------------------------------|---------------|---------------------------------|----------------------------------------------------------------------------------------------------------------------------------------------------------------------------------------------------------------------------------------------------------------------------------------------------------------------------------------------------------------------------------------------------------------------------------------------------------------------------------------------------------------------------------------------------------------------------------|----------------------------------------------------------------------------------------------------------------------------------------------------------------------------------------------------------|------------------------------------------------------------|-------------------------------------|
| <p><i>Nurses' perceptions of climate and environmental issues: A qualitative study</i><br/>(Anåker et al., 2015)</p> | <p>Sweden</p> | <p><i>Qualitative study</i></p> | <p>Nurses (N = 18) were recruited from hospitals, primary care and emergency medical services. Eight nurses participated in semi-structured, in-depth individual interviews and 10 participated in two focus groups</p> <p>Nurses' perceptions regarding climate and environmental issues and how to examine how nurses perceive their role in the creation of sustainable health care</p> <p>Nurses' perceptions regarding climate and environmental issues and nurse's daily work; and public health work is regarded as a health co-benefit of climate change mitigation.</p> | <p>Four areas were identified: incongruence between climate and environmental issues and nurse's daily work; and public health work is regarded as a health co-benefit of climate change mitigation.</p> | <p><i>Journal of Advanced Nursing (Indexed in JCR)</i></p> | <p>of 33<br/>30/32<br/>(93.75%)</p> |
|----------------------------------------------------------------------------------------------------------------------|---------------|---------------------------------|----------------------------------------------------------------------------------------------------------------------------------------------------------------------------------------------------------------------------------------------------------------------------------------------------------------------------------------------------------------------------------------------------------------------------------------------------------------------------------------------------------------------------------------------------------------------------------|----------------------------------------------------------------------------------------------------------------------------------------------------------------------------------------------------------|------------------------------------------------------------|-------------------------------------|

|                                                                                             |                     |                                                 |                                                                           |                                                                          |                                                                                                                                                                                                |                                                            |                                              |
|---------------------------------------------------------------------------------------------|---------------------|-------------------------------------------------|---------------------------------------------------------------------------|--------------------------------------------------------------------------|------------------------------------------------------------------------------------------------------------------------------------------------------------------------------------------------|------------------------------------------------------------|----------------------------------------------|
| <p><i>Planetary Health and the Role of Nursing: A Call to Action</i><br/>(Kurth, 2017)</p>  | <p>USA</p>          | <p>Literature Review</p>                        | <p>Not identified</p>                                                     | <p>Planetary health framework</p>                                        | <p>The impact of health sector and workforce in the energy and water consumption, highlighting the need of sustainable programs in health care environments, especially renewable energies</p> | <p>Journal of Nursing Scholarship<br/>(Indexed in JCR)</p> | <p>32<br/>Not Applicable</p>                 |
| <p><i>Tweet if you want to be sustainable: A thematic analysis of a Twitter chat to</i></p> | <p>UK and Spain</p> | <p>Qualitative study: constructive paradigm</p> | <p>One hundred and nineteen people posted nine hundred and ninety-six</p> | <p>Social media as factor to engage nurses' awareness and perception</p> | <p>The analysis of the tweets highlighted the relevance of sustainability for nurses. The most</p>                                                                                             | <p>Journal of Advanced Nursing<br/>(Indexed in JCR)</p>    | <p>28<br/>EQUATOR<br/>27/32<br/>(84.38%)</p> |

*discuss sustainability in nurse education* (Richardson, Grose, et al., 2016)

*Tweets, with reach up to 3,306,368, was analysed*

important topics identified were the sustainability among nursing/nurses via education, with focused on waste, especially plastic

---

|                                                                                                                                                        |                                                      |               |                                                                                                  |                                                                                                                   |                                                                                                                                                                                                      |                                               |    |                            |
|--------------------------------------------------------------------------------------------------------------------------------------------------------|------------------------------------------------------|---------------|--------------------------------------------------------------------------------------------------|-------------------------------------------------------------------------------------------------------------------|------------------------------------------------------------------------------------------------------------------------------------------------------------------------------------------------------|-----------------------------------------------|----|----------------------------|
| <b><i>Including sustainability issues in nurse education: comparative study of first year student nurses' attitudes in four European countries</i></b> | <i>European (UK, Germany, Spain and Switzerland)</i> | Observational | <i>First year Students Four European Universities (N=916) UK n=450 Germany n=196 Spain n=124</i> | <i>Sustainability Attitudes in European Nursing Survey (SANS_2) questionnaire and Demographic characteristics</i> | <i>This survey indicated a high score, so it could be highly useful to use it the nurses' awareness. There were significant differences in sustainability awareness of students between European</i> | <i>Nurse Education Today (Indexed in JCR)</i> | 26 | STROBE<br>20/32<br>(62.5%) |
|--------------------------------------------------------------------------------------------------------------------------------------------------------|------------------------------------------------------|---------------|--------------------------------------------------------------------------------------------------|-------------------------------------------------------------------------------------------------------------------|------------------------------------------------------------------------------------------------------------------------------------------------------------------------------------------------------|-----------------------------------------------|----|----------------------------|

---

---

(Richardson, Heidenreich, et al., 2016) *Switzerland n=146 countries, showing that German nurses' students had higher scores.*

---

|                                                                                                                            |         |                   |                          |                                         |                                                                                                                                                                                                                            |                                                     |                          |        |
|----------------------------------------------------------------------------------------------------------------------------|---------|-------------------|--------------------------|-----------------------------------------|----------------------------------------------------------------------------------------------------------------------------------------------------------------------------------------------------------------------------|-----------------------------------------------------|--------------------------|--------|
| <b><i>Towards environmentally responsible nursing: A critical interpretive synthesis</i></b><br>(Kangasniemi et al., 2013) | Finland | Systematic review | Selected papers (N = 11) | Environmental issues in nursing science | The papers identified nurses environmentally responsible for sustainability in diverse sectors. They need to be targeted as agents in environmental management and tools for practical environmental responsibility should | <i>Journal of Advanced Nursing (Indexed in JCR)</i> | of 23<br>33/53<br>62.26% | PRISMA |
|----------------------------------------------------------------------------------------------------------------------------|---------|-------------------|--------------------------|-----------------------------------------|----------------------------------------------------------------------------------------------------------------------------------------------------------------------------------------------------------------------------|-----------------------------------------------------|--------------------------|--------|

---

be included and presents in the curriculum.

---

|                                                                                                                           |     |                                |                                              |                                                                               |                                                                                                                                                                                                                                  |                                                   |    |                       |
|---------------------------------------------------------------------------------------------------------------------------|-----|--------------------------------|----------------------------------------------|-------------------------------------------------------------------------------|----------------------------------------------------------------------------------------------------------------------------------------------------------------------------------------------------------------------------------|---------------------------------------------------|----|-----------------------|
| <p><i>How the nursing profession can contribute to sustainable development goals</i><br/>(Benton &amp; Shaffer, 2016)</p> | USA | <p>Scientometrics analysis</p> | <p>N= 296 documents identified the topic</p> | <p>Millennium development goals (MDGs) and the role of nurses in policies</p> | <p>The results indicated how nurses' contribution, as professionals, has limited their contribution to the MDGs link to health. Despite not being so active in MDGs, nursing has been more proactive in addressing the SDGs.</p> | <p><i>Nursing Management (Indexed in JCR)</i></p> | 22 | <p>Not Applicable</p> |
|---------------------------------------------------------------------------------------------------------------------------|-----|--------------------------------|----------------------------------------------|-------------------------------------------------------------------------------|----------------------------------------------------------------------------------------------------------------------------------------------------------------------------------------------------------------------------------|---------------------------------------------------|----|-----------------------|

---



---

|                                                                                                                               |                                 |                              |                                                                                            |                                                                                                                                                                                                                                       |                                                            |           |                       |
|-------------------------------------------------------------------------------------------------------------------------------|---------------------------------|------------------------------|--------------------------------------------------------------------------------------------|---------------------------------------------------------------------------------------------------------------------------------------------------------------------------------------------------------------------------------------|------------------------------------------------------------|-----------|-----------------------|
| <p><i>Nursing and the USA</i><br/><i>sustainable development goals: From Nightingale to now</i><br/>(Dossey et al., 2019)</p> | <p><i>Literature Review</i></p> | <p><i>Not identified</i></p> | <p>Nurses as agents to contextual the SDGs related to the care provided and the system</p> | <p>The results highlight the evolution from the identification of Florence Nightingale of the relevance of environment to the relevant of sustainability for the care of patients, including nurses and adapting the environment.</p> | <p><i>American Journal of Nursing (Indexed in JCR)</i></p> | <p>22</p> | <p>Not Applicable</p> |
|-------------------------------------------------------------------------------------------------------------------------------|---------------------------------|------------------------------|--------------------------------------------------------------------------------------------|---------------------------------------------------------------------------------------------------------------------------------------------------------------------------------------------------------------------------------------|------------------------------------------------------------|-----------|-----------------------|

---
